# Supplementary material for: Oriented-attachment dimensionality build-up via van der Waals interaction
Source: Royal Society of Chemistry journal article supplement (doi:10.1039/c4ce01640h), 2014-11-27
Supplement: c4ce01640h1.pdf [file c4ce01640h1.pdf]

## Supporting information

### Oriented-attachment dimensionality build-up *via* van der Waals interaction

Weiqliang Lv<sup>†</sup>, Weirong Huo<sup>†</sup>, Yinghua Niu<sup>2</sup>, Yaxing Zhu<sup>1</sup>, Yutao Xie<sup>3</sup>, Xuyun Guo<sup>3</sup>, Weidong He<sup>1,4,5,\*</sup>

<sup>1</sup> School of Energy Science and Engineering, University of Electronic Science and Technology of China (UESTC), Chengdu 611731, PR China, <sup>2</sup> School of Chemical Engineering, Harbin Institute of Technology, Harbin 150001, PR China, <sup>3</sup> Department of Chemistry, the Hong Kong University of Science and Technology, Hong Kong, <sup>4</sup> Interdisciplinary Program in Materials Science, Vanderbilt University, Nashville, Tennessee 37234-0106, USA, <sup>5</sup> Vanderbilt Institute of Nanoscale Science and Engineering, Vanderbilt University, Nashville, Tennessee 37234-0106, USA. Correspondence and requests for materials should be addressed to W. H. (email: [weidong.he@uestc.edu.cn](mailto:weidong.he@uestc.edu.cn) and [weidong.he@vanderbilt.edu](mailto:weidong.he@vanderbilt.edu)).

<sup>†</sup> These two authors contribute equally to this work.

#### 1. Facet effect on the vdW of OA assembly of Ag nanorods

OA assembly of Ag nanorods along [111] crystalline orientation experiences smaller vdW compared with [100] and [110] directions. The vdW of OA assembly along [100] and [110] shows a rather small difference as evidenced by the nearly overlapped red curve and black curve. Therefore, NRs growth along [111] is thermodynamically unfavorable.

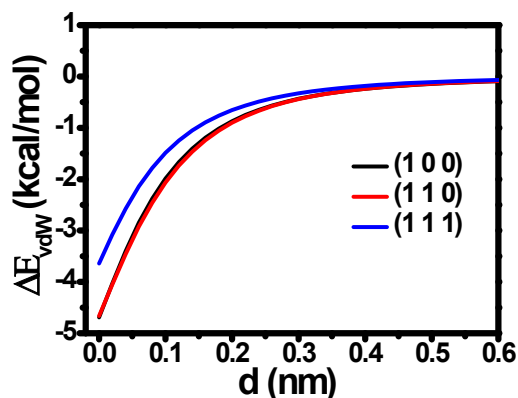

**Figure S1.** Calculated vdW interaction *versus* separation between NR and NP of different crystal faces along the axes of NRs with the diameters of 1.2 nm. The AR of Ag NR is fixed at 10.

## 2. The effect of diameter on the attaching energy of axial growth and off-axial growth of nanorods

Figure S2 shows  $\Delta E_{\text{vdW}}(0)$  versus the size of NRs and NPs in the on axial OA assembly and the off-axial assembly ( $0.5l$ ) between a NR and a NP. As the size of nanoparticles and nanorods increases, the difference of attachment energy between axial growth and  $0.5l$  off-axial growth increases significantly.

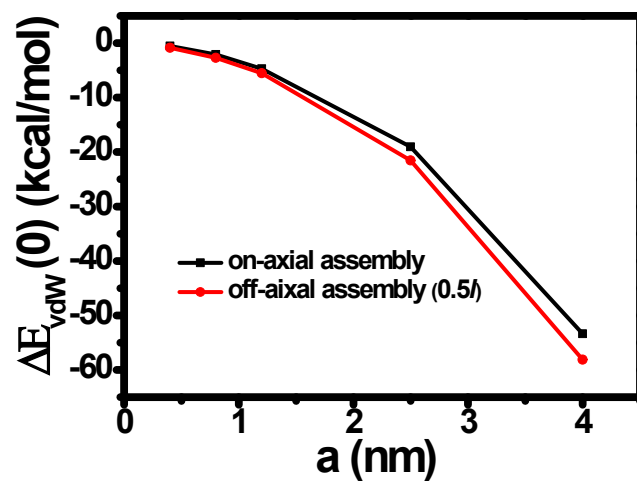

**Figure S2**  $\Delta E_{\text{vdW}}(0)$  versus the size of NRs and NPs in the on axial OA assembly and the off-axial assembly ( $0.5l$ ) between a NR and a NP.
